# Supplementary material
Source: Springer Nature journal article supplement (https://www.springermedizin.de/resource/supplementary/13017_2014_395_MOESM1_ESM.pdf/9636104)
Supplement: MOESM1 [file 9636104]

**A** Two major classes of femur fractures.

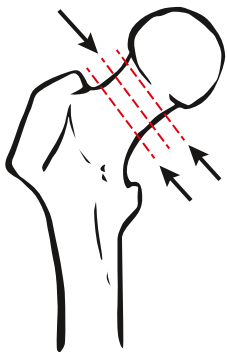

(a) Femoral neck fractures

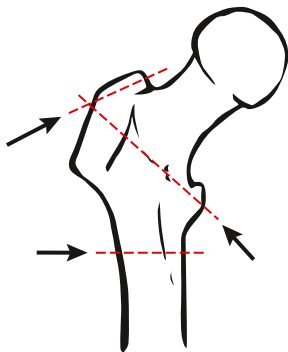

(b) All trochanteric fractures

**B** Five categories of femur fracture types.

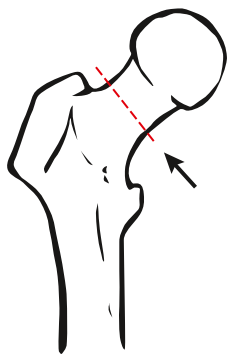

(a) Femoral neck

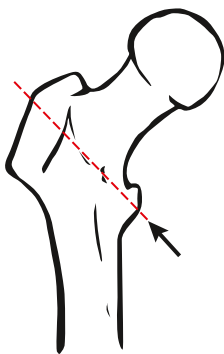

(b) Intertrochanteric

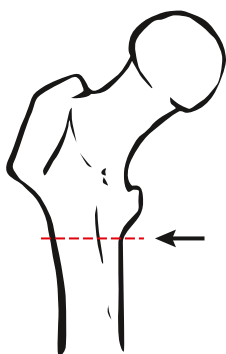

(c) Subtrochanteric

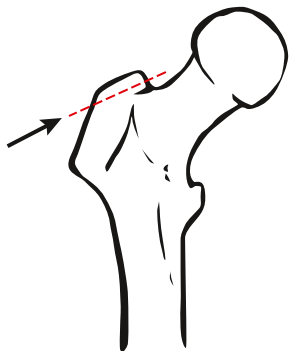

(d) Greater trochanter

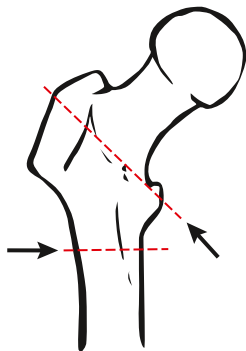

(e) Inter/subtrochanteric
